# Supplementary material for: Benefit of Early Ruxolitinib Initiation Regardless of Fibrosis Grade in Patients with Primary Myelofibrosis: A Post Hoc Analysis of the Single-Arm Phase 3b JUMP Study
Source: MDPI journal article supplement (doi:10.3390/cancers15102859), 2023-05-22
Supplement: s1 [file s1]

## Supplementary materials

**Supplementary Table S1.** Number of patients with PMF achieving a spleen response at Week 24 stratified by time since last biopsy.

|                                                        | LGF                     | HGF                     |
|--------------------------------------------------------|-------------------------|-------------------------|
|                                                        | n (%) [95% CI]          | n (%) [95% CI]          |
|                                                        | N=113                   | N=384                   |
| <b>Week 24</b>                                         |                         |                         |
| Ruxolitinib initiated $\leq 2$ years since last biopsy | 72 (63.7) [54.1, 72.6]  | 230 (59.9) [54.8, 64.8] |
| Ruxolitinib initiated $> 2$ years since last biopsy    | 51 (60.7) [49.5, 71.2]  | 96 (46.2) [39.2, 53.2]  |
| <b>At any time during the study</b>                    |                         |                         |
| Ruxolitinib initiated $\leq 2$ years since last biopsy | 109 (81.3) [73.7, 87.5] | 382 (73.0) [69.0, 76.8] |
| Ruxolitinib initiated $> 2$ years since last biopsy    | 72 (71.3) [61.4, 79.9]  | 172 (63.7) [57.7, 69.4] |

Spleen response was assessed by reduction in spleen length from baseline and expressed as the proportion of patients with a  $\geq 50\%$  reduction in palpable spleen length. CI, confidence interval; HGF, high-grade fibrosis; LGF, low-grade fibrosis; PMF, primary myelofibrosis.

## Supplementary Figure S1. JUMP study design.

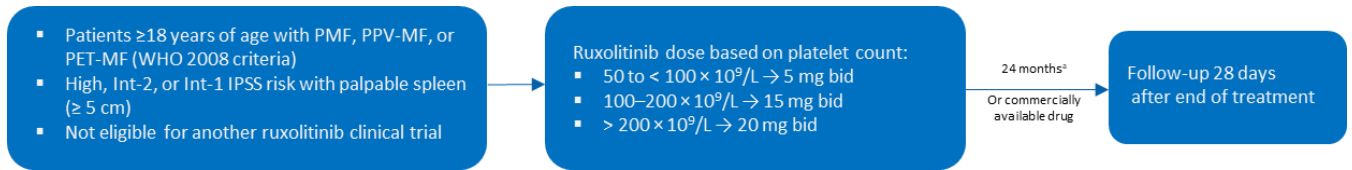

<sup>a</sup> Patients could also discontinue treatment in the event disease progression, unacceptable toxicity, death, or discontinuation from the study for any other reason.

bid, twice daily; Int, intermediate; IPSS, International Prognostic Scoring System; PET-MF, post-essential thrombocythemia myelofibrosis; PMF, primary myelofibrosis; PPV-MF, post-polycythemia vera myelofibrosis.

**Supplementary Figure S2. Patient disposition.**

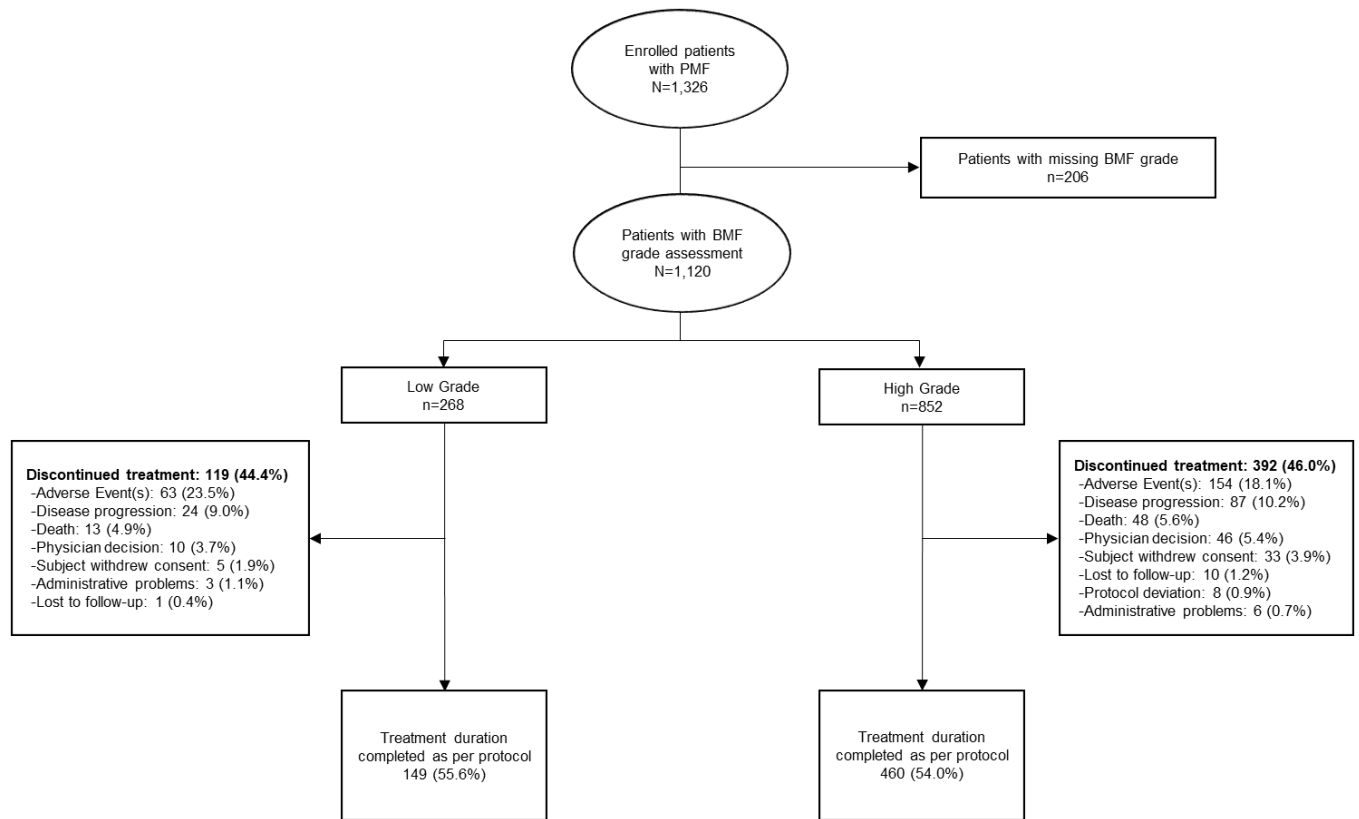

BMF, bone marrow fibrosis; PMF, primary myelofibrosis.

**Supplementary Figure S3. A.** Proportion of patients with PMF achieving a spleen response at Week 24 stratified by time since diagnosis and time since last biopsy. **B.** Proportion of patients with PMF achieving a spleen response at any time during the study stratified by time since diagnosis and time since last biopsy.

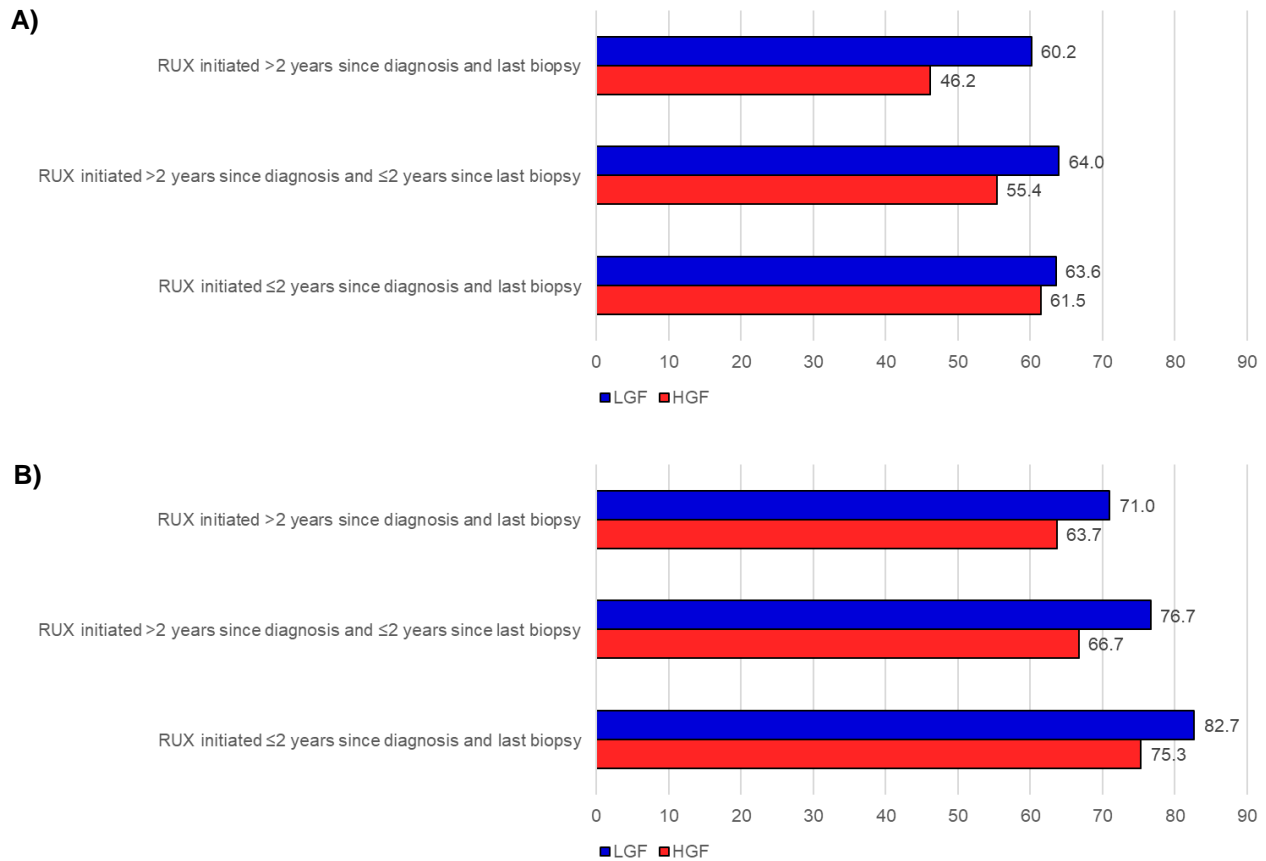

HGF, high-grade fibrosis; LGF, low-grade fibrosis; PMF, primary myelofibrosis; RUX, ruxolitinib.

**Supplementary Figure S4.** Progression-free survival in patients with PMF stratified by time since last biopsy. **A**, Patients who started ruxolitinib treatment  $\leq 2$  years since their last biopsy. **B**, Patients who started ruxolitinib treatment  $>2$  years since their last biopsy.

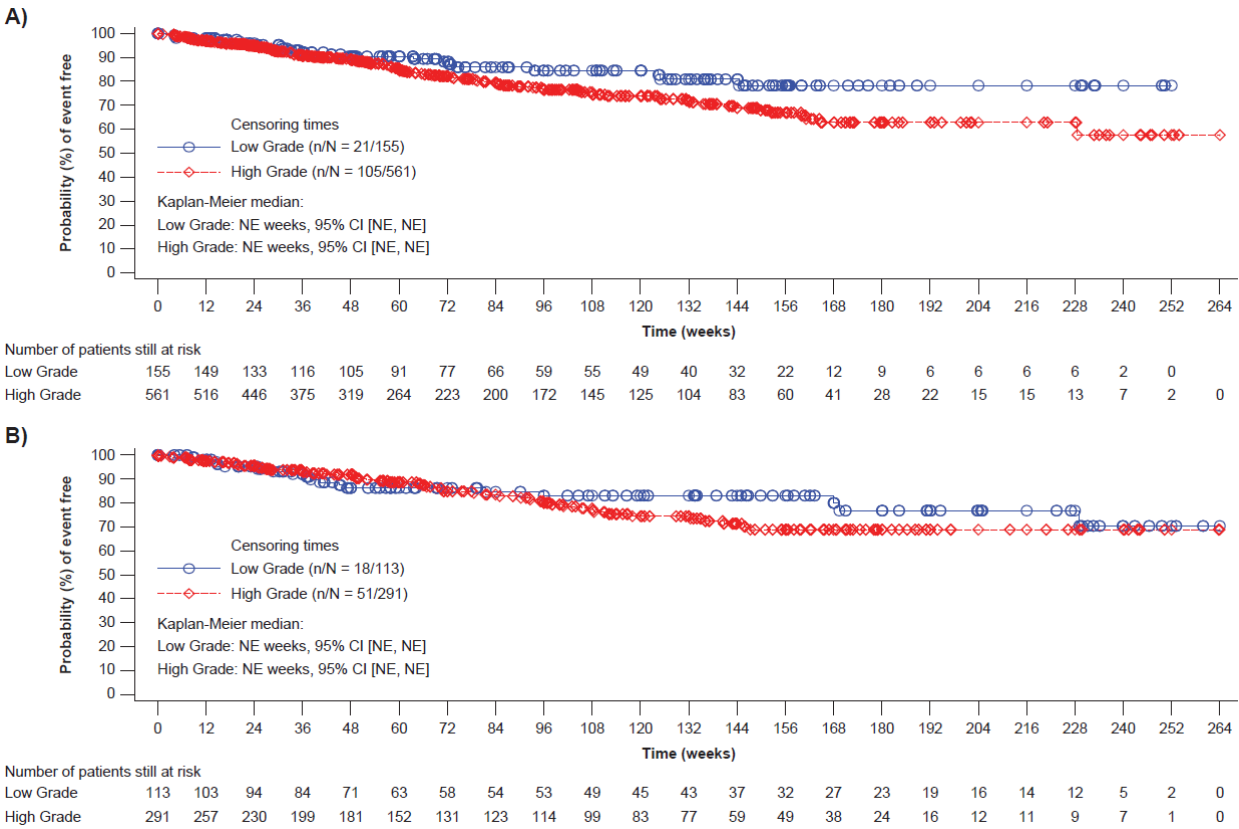

CI, confidence interval; NE, not estimable; PMF, primary myelofibrosis.

**Supplementary Figure S5.** Overall survival in patients with PMF stratified by time since last biopsy. **A**, Patients who started ruxolitinib treatment  $\leq 2$  years since their last biopsy. **B**, Patients who started ruxolitinib treatment  $>2$  years since their last biopsy.

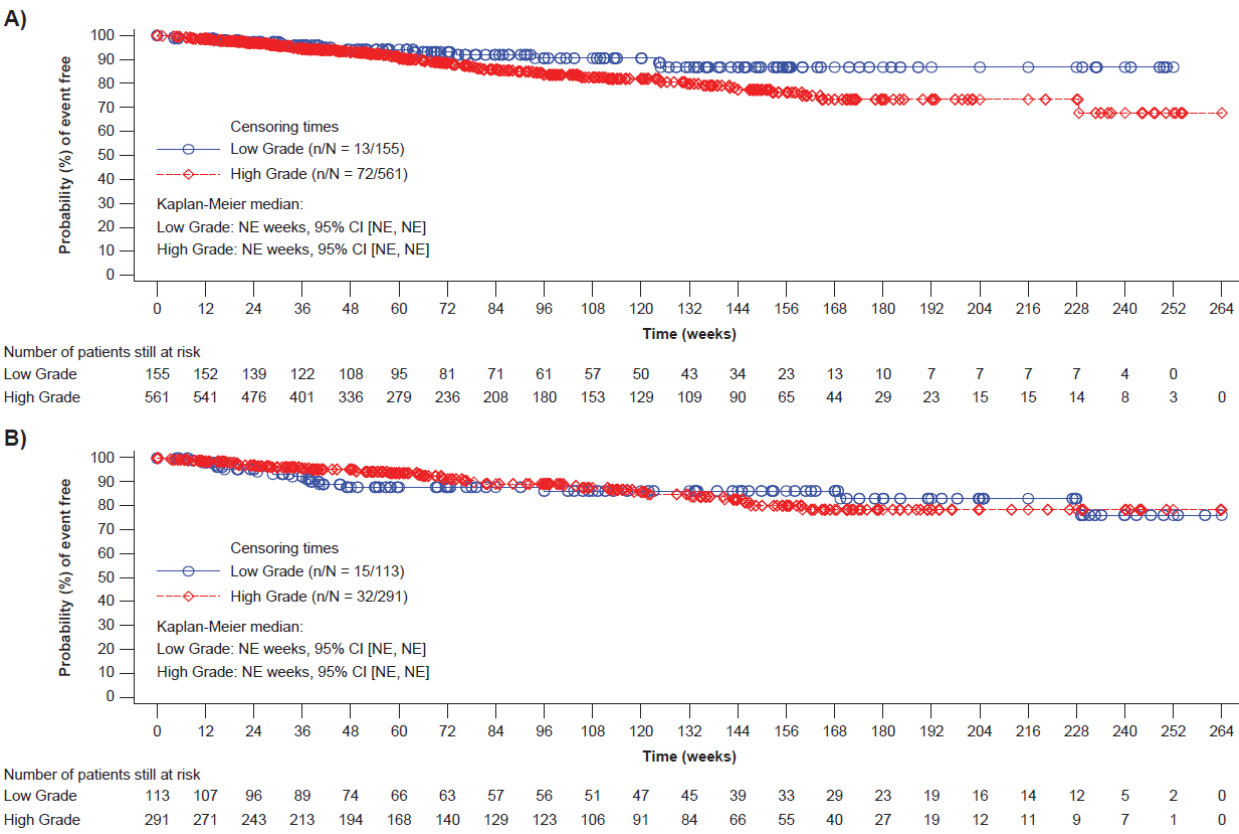

CI, confidence interval; NE, not estimable; PMF, primary myelofibrosis.
