# Supplementary material for: Benefit of Early Ruxolitinib Initiation Regardless of Fibrosis Grade in Patients with Primary Myelofibrosis: A Post Hoc Analysis of the Single-Arm Phase 3b JUMP Study
Source: MDPI journal article supplement (doi:10.3390/cancers15102859), 2023-05-22
Supplement: s1 [file s1]

Study reference for approval: INC424A2401

| <b>Center No.</b> | <b>Ethics Committee or Institutional Review Board</b>                 | <b>Department / Organization</b>                             | <b>City, State/Province, Postal Code Country</b>                   |
|-------------------|-----------------------------------------------------------------------|--------------------------------------------------------------|--------------------------------------------------------------------|
| 1                 | Ottawa Hospital Research Ethics Board                                 | 725 Parkdale Avenue, Loeb building                           | Ottawa ON K1Y 1J7 Canada                                           |
| 2                 | UBC Providence Health Care Research Institute                         | 1081 Burrard Street, 11th Floor, Hornby Site                 | Vancouver BC V6Y 1Y6 Canada                                        |
| 4                 | Ontario Cancer Research Ethics Board                                  | 101 College Street, MaRs Centre, South Tower, Room 800       | Toronto ON M5G 0A3 Canada                                          |
| 5                 | Comite d' Ethique de la recherche du CHU de Quebec                    | 10 Rue de L'Espinay, Local AO-124                            | Quebec QC G1L 3L5 Canada                                           |
| 6                 | McGill Faculty of Medicine Institutional Review Board                 | 3655 Promenade Sir William Osler                             | Montreal QC H3G 1Y6 Canada                                         |
| 7                 | Capital health Research Ethics Bord                                   | 5790 University ave.                                         | Halifax NS B3H 1V7 Canada                                          |
| 8                 | Ontario Cancer Research Ethics Board                                  | 101 College Street, MaRs Centre, South Tower, Room 800       | Toronto ON M5G 0A3 Canada                                          |
| 9                 | Ontario Cancer Research Ethics Board                                  | 101 College Street, MaRs Centre, South Tower, Room 800       | Toronto ON M5G 0A3 Canada                                          |
| 10                | Biomedical Research Ethics Board (Bio-REB) University of Saskatchewan | 1607 - 110 Gymnasium Place                                   | Saskatoon SK S7N 4J8 Canada                                        |
| 11                | Horizon Health Network Research Ethics Board                          | 400 University Avenue                                        | Moncton NB E1C 6Z8 Canada                                          |
| 12                | HREBA Cancer Committee                                                | 10104 103 Avenue, Room 1500                                  | Edmonton AB T5J 4A7 Canada                                         |
| 50                | Siriraj Institutional Review Board                                    | Faculty of Medicine, Siriraj Hospital                        | 2, Wanglang Rd., Kwaeng Siriraj, Khet Bangkok Noi Bangkok Thailand |
| 51                | Med Chula IRB                                                         | Reserch Affairs, Faculty of Medicine, Chulalongkorn Hospital | Pathumwan Bangkok Thailand                                         |
| 52                | Research Affairs                                                      | Faculty of Medicine, Ramathibodi Hospital                    | Research and Welfare Buiding, 3rd fl, Ratchathewi Bangkok Thailand |
| 53                | Research Affairs                                                      | Faculty of Medicine, Chiang Mai University                   | 110, Inthawaroros Rd., Sriphum, Muang Chiang Mai Thailand          |
| 90                | EC CHU Beni Messous                                                   | Ophtalmology                                                 | Algiers Algeria                                                    |

|     |                                                                             |                                                                                                |                                               |
|-----|-----------------------------------------------------------------------------|------------------------------------------------------------------------------------------------|-----------------------------------------------|
| 120 | Comite D'Ethique Hopital La Rabta                                           | Regional Patients Protection Committee<br>Centre National de Pharmacovigilance (CNPV) of Tunis | Tunis-Bab Souika<br>Tunisia                   |
| 121 | Comite d'Ethique CHU Farhat Hached                                          | Regional Patients Protection Committee<br>Centre National de Pharmacovigilance (CNPV) of Tunis | Tunis-Bab Souika<br>Tunisia                   |
| 122 | Comite d'Ethique HOPITAL HEDI CHAKER                                        | Regional Patients Protection Committee<br>Centre National de Pharmacovigilance (CNPV) of Tunis | Tunis-Bab Souika<br>Tunisia                   |
| 123 | Comite d'Ethique Hopital Militaire                                          | Regional Patients Protection Committee<br>Centre National de Pharmacovigilance (CNPV) of Tunis | Tunis-Bab Souika<br>Tunisia                   |
| 200 | Ethic committee of Hadassah MC                                              | NA                                                                                             | Jerusalem 91120<br>Israel                     |
| 201 | Helsinki committee, Rabin MC                                                | NA                                                                                             | Petach Tikva 49100<br>Israel                  |
| 202 | Ethic committee of Sourasky MC                                              | NA                                                                                             | Tel Aviv 64239<br>Israel                      |
| 203 | Ethic committee of Bnai Zion MC                                             | NA                                                                                             | Haifa 31048<br>Israel                         |
| 204 | Ethic committee of HaEmek MC                                                | NA                                                                                             | Afula 18101<br>Israel                         |
| 205 | Ethic committee of Sheba MC                                                 | NA                                                                                             | Ramat Gan 52621<br>Israel                     |
| 400 | Federal Almazov North-West scientific research center ethic committee       | NA                                                                                             | Saint-Petersburg 197341<br>Russian Federation |
| 401 | Russian Research institute of transfusiology and Hematology Ethic committee | NA                                                                                             | Saint-Petersburg 191024<br>Russian Federation |
| 402 | Novosibirsk medical university Ethic Committee                              | NA                                                                                             | Novosibirsk 630051<br>Russian Federation      |
| 404 | Irkutsk Regional Hospital Ethic committee                                   | NA                                                                                             | Irkutsk 664528<br>Russian Federation          |
| 405 | Nizhniy Novgorod Regional hospital I.M. Semashko Ethic committee            | NA                                                                                             | Nizhniy Novgorod 603126<br>Russian Federation |
| 406 | Hematology scientific center Ethic Committee                                | NA                                                                                             | Moscow125167<br>Russian Federation            |

|      |                                                                        |                                       |                                           |
|------|------------------------------------------------------------------------|---------------------------------------|-------------------------------------------|
| 407  | Rostov Medical University<br>Ethic committee                           | NA                                    | Rostov-on-Don344022<br>Russian Federation |
| 600  | The South African Medical Association (SAMAREC)                        | N/A                                   | Pretoria Gauteng<br>South Africa          |
| 601  | The South African Medical Association (SAMAREC)                        | N/A                                   | Pretoria Gauteng<br>South Africa          |
| 603  | SAMAREC                                                                | N/A                                   | Pretoria Gauteng<br>South Africa          |
| 604  | Human Research Ethics Committee (HREC),<br>University of Witwatersrand | Medical                               | Johannesburg Gauteng<br>South Africa      |
| 605  | SAMAREC                                                                | N/A                                   | Pretoria Gauteng<br>South Africa          |
| 900  | Ethikkommission der Medizinischen Universität Wien                     | Borschkegasse 8b/E06                  | Vienna<br>Austria                         |
| 901  | Ethikkommission des Landes Salzburg                                    | Michael-Pacher-Strasse 36 (EG, Zi.48) | Salzburg<br>Austria                       |
| 902  | Ethikkommission der Medizinischen Universität Innsbruck                | Innrain 43                            | Innsbruck<br>Austria                      |
| 903  | Ethikkommission der Medizinischen Universität Wien                     | Borschkegasse 8b/E06                  | Vienna<br>Austria                         |
| 904  | Ethikkommission der Med.-Universität Graz                              | Auenbruggerplatz 2, 3.OG              | Graz<br>Austria                           |
| 905  | Ethikkommission des Krankenhaus der Barmherzigen Schwestern Linz       | Seilerstatte 4                        | Linz<br>Austria                           |
| 906  | Ethikkommission des Krankenhaus der Elisabethinen Linz GmbH            | Fadingerstrasse 1                     | Linz<br>Austria                           |
| 1017 | Eticka komise Fakultni nemocnice Olomouc                               | NA                                    | Olomouc 775 20<br>Czech Republic          |
| 1018 | Eticka komise Fakultni nemocnice Brno                                  | NA                                    | Brno 625 00<br>Czech Republic             |
| 1019 | Eticka komise UHKT                                                     | NA                                    | Praha 128 20<br>Czech Republic            |
| 1020 | Eticka komise Fakultni nemocnice Hradec Kralova                        | NA                                    | Hradec Kralova 500 05<br>Czech Republic   |
| 1100 | Ethikkommission der Ärztekammer Westfalen-Lippe und der Medizinischen  | NA                                    | Munster NA<br>Germany                     |

|      |                                                                                                                               |    |                               |
|------|-------------------------------------------------------------------------------------------------------------------------------|----|-------------------------------|
|      | Fakultat der Westfälischen Wilhelms-Universität Münster                                                                       |    |                               |
| 1101 | Ethikkommission an der Medizinischen Fakultät der RWTH Aachen                                                                 | NA | Aachen NA<br>Germany          |
| 1102 | Universitätsklinikum Jena Ethik-Kommission                                                                                    | NA | Jena NA 07740<br>Germany      |
| 1103 | Ethik-Kommission der Medizinischen Fakultät Heidelberg                                                                        | NA | Heidelberg NA<br>Germany      |
| 1104 | Technische Universität München Fakultät für Medizin Ethikkommission                                                           | NA | München NA<br>Germany         |
| 1105 | Otto-von-Guericke-Universität Magdeburg Ethikkommission an der Medizinischen Fakultät Universitätsklinikum                    | NA | Magdeburg NA 39120<br>Germany |
| 1106 | Sächsische Landesärztekammer Ethikkommission                                                                                  | NA | Dresden NA 01009<br>Germany   |
| 1107 | Ärztekammer Hamburg Ethikkommission                                                                                           | NA | Hamburg NA<br>Germany         |
| 1108 | Landesamt für Gesundheit und Soziales Ethikkommission des Landes Berlin                                                       | NA | Berlin NA<br>Germany          |
| 1109 | Albert-Ludwigs-Universität Freiburg Ethikkommission                                                                           | NA | Freiburg NA<br>Germany        |
| 1110 | Ethik-Kommission des Fachbereichs Medizin der Johann Wolfgang Goethe-Universität Universitätsklinikum                         | NA | Frankfurt NA<br>Germany       |
| 1111 | Ärztekammer Nordrhein Ethikkommission                                                                                         | NA | Düsseldorf NA<br>Germany      |
| 1112 | Ethikkommission der Ärztekammer Westfalen-Lippe und der Medizinischen Fakultät der Westfälischen Wilhelms-Universität Münster | NA | Münster NA<br>Germany         |
| 1113 | Ethikkommission des Landes Bremen Klinikum Bremen-Mitte gGmbH                                                                 | NA | Bremen NA<br>Germany          |

|      |                                                                                                                         |    |                             |
|------|-------------------------------------------------------------------------------------------------------------------------|----|-----------------------------|
|      | Institut für<br>Pharmakologie                                                                                           |    |                             |
| 1114 | Ethik-Kommission der<br>Universitätsklinikum<br>Essen<br>Medizinische Fakultät<br>der<br>Universität Duisburg-<br>Essen | NA | Essen NA<br>Germany         |
| 1115 | Landesamt für<br>Gesundheit<br>und Soziales<br>Ethikkommission des<br>Landes Berlin                                     | NA | Berlin NA<br>Germany        |
| 1116 | Ethikkommission an der<br>Medizinischen Fakultät<br>der<br>Universität Leipzig                                          | NA | Leipzig NA 04107<br>Germany |
| 1117 | LandesArztekammer<br>Rheinland-Pfalz<br>Ethikkommission                                                                 | NA | Mainz NA<br>Germany         |
| 1118 | Ethikkommission bei der<br>LandesArztekammer<br>Baden-Württemberg                                                       | NA | Stuttgart NA<br>Germany     |
| 1119 | Geschäftsstelle<br>Ethikkommission<br>Universität zu Köln                                                               | NA | Köln NA<br>Germany          |
| 1120 | Universität Rostock<br>Medizinische Fakultät<br>Ethikkommission                                                         | NA | Rostock NA<br>Germany       |
| 1121 | Ludwig-Maximilians-<br>Universität München<br>Klinikum der Universität<br>Ethik-Kommission                              | NA | München NA<br>Germany       |
| 1122 | Ethik-Kommission der<br>Medizinischen Fakultät<br>der<br>Christian-Albrechts-<br>Universität zu Kiel                    | NA | Kiel NA<br>Germany          |
| 1123 | Universität Ulm<br>Ethik-Kommission                                                                                     | NA | Ulm NA<br>Germany           |
| 1124 | Ethik-Kommission der<br>Medizinischen Fakultät<br>der<br>Heinrich-Heine-<br>Universität<br>Düsseldorf                   | NA | Düsseldorf NA<br>Germany    |
| 1125 | Arztekammer Nordrhein<br>Ethikkommission                                                                                | NA | Düsseldorf NA<br>Germany    |
| 1127 | Ethik-Kommission der<br>Bayerischen<br>Landesarztekammer                                                                | NA | München NA<br>Germany       |
| 1128 | Arztekammer Nordrhein<br>Ethikkommission                                                                                | NA | Düsseldorf NA<br>Germany    |

|      |                                                                                                                                                     |    |                              |
|------|-----------------------------------------------------------------------------------------------------------------------------------------------------|----|------------------------------|
| 1129 | Ethikkommission der<br>Arztekammer<br>Westfalen-Lippe und der<br>Medizinischen<br>Fakultät der<br>Westfälischen<br>Wilhelms-<br>UniversitAt Munster | NA | Munster NA<br>Germany        |
| 1130 | Universitätsmedizin<br>Greifswald<br>Ethikkommission<br>Institut für<br>Pharmakologie                                                               | NA | Greifswald NA<br>Germany     |
| 1131 | Ethik-Kommission der<br>Arztekammer<br>Niedersachsen                                                                                                | NA | Hannover NA<br>Germany       |
| 1132 | Ethikkommission der<br>Arztekammer<br>Westfalen-Lippe und der<br>Medizinischen<br>Fakultät der<br>Westfälischen<br>Wilhelms-<br>UniversitAt Munster | NA | Munster NA<br>Germany        |
| 1133 | Arztekammer Nordrhein<br>Ethikkommission                                                                                                            | NA | Dusseldorf NA<br>Germany     |
| 1135 | Ethik-Kommission der<br>Bayerischen<br>LandesArztekammer                                                                                            | NA | Munchen NA<br>Germany        |
| 1136 | LandesArztekammer<br>Hessen<br>Ethik-Kommission                                                                                                     | NA | Frankfurt NA<br>Germany      |
| 1137 | Landesamt für<br>Verbraucherschutz<br>Ethik-Kommission des<br>Landes Sachsen-Anhalt                                                                 | NA | Dessau-Rosslau NA<br>Germany |
| 1138 | Ethikkommission der<br>Arztekammer<br>Westfalen-Lippe und der<br>Medizinischen<br>Fakultät der<br>Westfälischen<br>Wilhelms-<br>Universität Munster | NA | Munster NA<br>Germany        |
| 1139 | Ethik-Kommission der<br>LandesArztekammer<br>Brandenburg                                                                                            | NA | Cottbus NA 03044<br>Germany  |
| 1141 | Ethikkommission bei der<br>LandesArztekammer<br>Baden-Württemberg                                                                                   | NA | Stuttgart NA<br>Germany      |
| 1142 | Ethik-Kommission der<br>UniversitAt Gottingen<br>Medizinische Fakultät                                                                              | NA | Gottingen NA<br>Germany      |
| 1143 | Ethik-Kommission der<br>Medizinischen                                                                                                               | NA | Hannover NA<br>Germany       |

|      |                                                                                                        |    |                               |
|------|--------------------------------------------------------------------------------------------------------|----|-------------------------------|
|      | Hochschule<br>Hannover                                                                                 |    |                               |
| 1144 | LandesArztekammer<br>Hessen<br>Ethik-Kommission                                                        | NA | Frankfurt NA<br>Germany       |
| 1146 | Ethik-Kommission der<br>Arztekammer<br>Niedersachsen                                                   | NA | Hannover NA<br>Germany        |
| 1147 | Ethik-Kommission der<br>Bayerischen<br>LandesArztekammer                                               | NA | Munchen NA<br>Germany         |
| 1149 | Arztekammer Hamburg<br>Ethikkommission                                                                 | NA | Hamburg NA<br>Germany         |
| 1150 | Ethik-Kommission der<br>Bayerischen<br>LandesArztekammer                                               | NA | Munchen NA<br>Germany         |
| 1152 | LandesArztekammer<br>Hessen<br>Ethik-Kommission                                                        | NA | Frankfurt NA<br>Germany       |
| 1153 | Philipps-Universitat<br>Marburg<br>Fachbereich Medizin<br>Dekanat/Ethikkommission                      | NA | Marburg NA<br>Germany         |
| 1154 | Sachsische<br>LandesArztekammer<br>Ethikkommission                                                     | NA | Dresden NA 01009<br>Germany   |
| 1156 | Ethik-Kommission der<br>Bayerischen<br>LandesArztekammer                                               | NA | Munchen NA<br>Germany         |
| 1159 | Friedrich-Alexander-<br>Universitat Erlangen-<br>Nurnberg<br>Medizinische Fakultat<br>Ethik-Kommission | NA | Erlangen NA<br>Germany        |
| 1162 | Ethik-Kommission der<br>Bayerischen<br>LandesArztekammer                                               | NA | Munchen NA<br>Germany         |
| 1163 | Arztekammer Nordrhein<br>Ethikkommission                                                               | NA | Dusseldorf NA<br>Germany      |
| 1166 | Ethik-Kommission der<br>Arztekammer<br>Niedersachsen                                                   | NA | Hannover NA<br>Germany        |
| 1169 | Ethik-Kommission der<br>Arztekammer<br>Niedersachsen                                                   | NA | Hannover NA<br>Germany        |
| 1300 | Regionalis es Intezeti<br>Kutatasetikai Bizottsag                                                      | NA | Szombathely H-9700<br>Hungary |
| 1301 | Regionalis Human<br>Orvosbiologiai<br>Kutatasetikai<br>Bizottsag                                       | NA | Szeged H-6725<br>Hungary      |
| 1303 | Regionalis es Intezmenyi<br>Kutatasetikai Bizottsag                                                    | NA | Debrecen H-4032<br>Hungary    |

|      |                                                                                                                                                                                        |                                                                                                                                                                                  |                                                                                |
|------|----------------------------------------------------------------------------------------------------------------------------------------------------------------------------------------|----------------------------------------------------------------------------------------------------------------------------------------------------------------------------------|--------------------------------------------------------------------------------|
| 1304 | Kutatasetikai Bizottsag                                                                                                                                                                | NA                                                                                                                                                                               | Budapest H-1097<br>Hungary                                                     |
| 1306 | Intezeti Kutatasetikai<br>Bizottsag                                                                                                                                                    | NA                                                                                                                                                                               | Kaposvar H-7400<br>Hungary                                                     |
| 1400 | COMITATO ETICO<br>AREA<br>VASTA CENTRO                                                                                                                                                 | AZIENDA OSPEDALIERO<br>UNIVERSITARIA<br>CAREGGI DI FIRENZE                                                                                                                       | LARGO GIOVANNI<br>ALESSANDRO<br>BRAMBILLA, 3<br>Firenze (FI)<br>Italy          |
| 1401 | COMITATO<br>INDIPENDENTE DI<br>ETICA<br>MEDICA                                                                                                                                         | AUSL BR/1 DI BRINDISI                                                                                                                                                            | VIA NAPOLI, 8 BRINDISI<br>(BR)<br>Italy                                        |
| 1402 | COMITATO ETICO<br>DELL'AZIENDA<br>OSPEDALIERO-<br>UNIVERSITARIA<br>POLICLINICO -<br>VITTORIO<br>EMANUELE DI<br>CATANIA -<br>per POU Vittorio<br>Emanuele, Ferrarotto,<br>Santo Bambino | COMITATO ETICO<br>DELL'AZIENDA<br>OSPEDALIERO-<br>UNIVERSITARIA<br>POLICLINICO - VITTORIO<br>EMANUELE DI CATANIA - per<br>POU Vittorio<br>Emanuele, Ferrarotto, Santo<br>Bambino | VIA GESUALDO<br>CLEMENTI, 36<br>CATANIA (CT)<br>Italy                          |
| 1403 | COMITATO ETICO PER<br>LA<br>SPERIMENTAZIONE<br>CLINICA DEI<br>MEDICINALI<br>AREA VASTA SUD EST                                                                                         | AZIENDA OSPEDALIERA<br>UNIVERSITARIA<br>SENESE DI SIENA                                                                                                                          | c/o UOC Farmacia AOUS -<br>Viale<br>Bracci SIENA (SI)<br>Italy                 |
| 1404 | COMITATO ETICO<br>DELLA<br>PROVINCIA DI<br>MODENA                                                                                                                                      | C/O AZIENDA POLICLINICO                                                                                                                                                          | VIA DEL POZZO 71<br>MODENA (MO)<br>Italy                                       |
| 1405 | COMITATO ETICO<br>PROVINCIALE DI<br>REGGIO<br>EMILIA                                                                                                                                   | c/o Azienda<br>Ospedaliera Arcispedale S.<br>Maria Nuova/IRCCS - I-RS<br>Edificio Spallanzani                                                                                    | Viale Umberto I, 50<br>REGGIO<br>EMILIA (RE)<br>Italy                          |
| 1406 | COMITATO ETICO<br>DELL'AZIENDA<br>OSPEDALIERA<br>POLICLINICO<br>CONSORZIALE DI BARI                                                                                                    | COMITATO ETICO<br>DELL'AZIENDA OSPEDALIERA<br>POLICLINICO<br>CONSORZIALE DI BARI                                                                                                 | PIAZZALE GIULIO<br>CESARE, 11<br>BARI (BA)<br>Italy                            |
| 1407 | COMITATO ETICO<br>DELL'AZIENDA<br>OSPEDALIERA<br>BIANCHI -<br>MELACRINO -<br>MORELLI DI REGGIO<br>CALABRIA                                                                             | COMITATO ETICO<br>DELL'AZIENDA OSPEDALIERA<br>BIANCHI - MELACRINO -<br>MORELLI DI REGGIO<br>CALABRIA                                                                             | VIA SPIRITO SANTO 24<br>REGGIO<br>DI CALABRIA (RC)<br>Italy                    |
| 1408 | COMITATO ETICO<br>DELLE<br>AZIENDE<br>SANITARIE<br>DELL'UMBRIA                                                                                                                         | SEGRETERIA SCIENTIFICO-<br>AMMINISTRATIVA DEL CEAS<br>UMBRIA                                                                                                                     | Via della Rivoluzione,<br>16 - ELLERA DI<br>CORCIANO<br>CORCIANO (PG)<br>Italy |



|      |                                                                                 |                                                                                      |                                                              |
|------|---------------------------------------------------------------------------------|--------------------------------------------------------------------------------------|--------------------------------------------------------------|
| 1409 | COMITATO ETICO DELL'AZIENDA OSPEDALIERA A.CARDARELLI NAPOLI                     | COMITATO ETICO DELL'AZIENDA OSPEDALIERA A.CARDARELLI NAPOLI                          | Via Cardarelli Antonio, 9<br>NAPOLI (NA)<br>Italy            |
| 1410 | COMITATO ETICO INDIPENDENTE                                                     | FONDAZIONE PTV POLICLINICO TOR VERGATA DI ROMA                                       | VIALE OXFORD, 81 ROMA (RM)<br>Italy                          |
| 1411 | COMITATO ETICO PROVINCIALE DI VARESE                                            | C/O OSPEDALE DI CIRCOLO E FONDAZIONE MACCHI                                          | VIALE LUIGI BORRI 57 VARESE (VA)<br>Italy                    |
| 1412 | COMITATO ETICO REGIONALE UNICO (CERU)                                           | c/o AZIENDA OSPEDALIERO-UNIVERSITARIA S. MARIA DELLA MISERICORDIA DI UDINE           | Piazzale S. MARIA DELLA MISERICORDIA, 15 UDINE (UD)<br>Italy |
| 1413 | COMITATO ETICO PER LA SPERIMENTAZIONE CLINICA DELLE PROVINCE DI VERONA E ROVIGO | AOUI VERONA                                                                          | PIAZZALE LUDOVICO ANTONIO SCURO, 10 VERONA (VR)<br>Italy     |
| 1414 | COMITATO ETICO AREA DI PAVIA                                                    | FONDAZIONE IRCCS POLICLINICO SAN MATTEO DI PAVIA                                     | VIALE GOLGI 19 PAVIA (PV)<br>Italy                           |
| 1415 | COMITATO ETICO MILANO AREA C                                                    | c/o Azienda Ospedaliera Ospedale Niguarda Ca' Granda - Padiglione 7, Ala D, 4° piano | PIAZZA DELL' OSPEDALE MAGGIORE, 3 MILANO (MI)<br>Italy       |
| 1416 | COMITATO ETICO DELL'UNIVERSITA' SAPIENZA                                        | COMITATO ETICO DELL'UNIVERSITA' SAPIENZA                                             | VIALE DEL POLICLINICO, 155 ROMA (RM)<br>Italy                |
| 1417 | COMITATO ETICO DEGLI ISTITUTI FISIOTERAPICI OSPITALIERI (IRCCS) DI ROMA         | COMITATO ETICO DEGLI ISTITUTI FISIOTERAPICI OSPITALIERI (IRCCS) DI ROMA              | VIA ELIO CHIANESI 53 ROMA (RM)<br>Italy                      |
| 1418 | COMITATO ETICO LAZIO 1                                                          | ZIENDA OSPEDALIERA SAN CAMILLO - C. FORLANINI DI ROMA                                | CIRCONVALLAZIONE GIANICOLENSE, 87 ROMA (RM)<br>Italy         |
| 1419 | COMITATO ETICO REGIONE LIGURIA                                                  | c/o IRCCS AOU SAN MARTINO - IST ISTITUTO NAZIONALE PER LA RICERCA SUL CANCRO         | LARGO ROSANNA BENZI, 10 GENOVA (GE)<br>Italy                 |
| 1420 | COMITATO ETICO REGIONE LIGURIA                                                  | c/o IRCCS AOU SAN MARTINO - IST ISTITUTO NAZIONALE PER LA RICERCA SUL CANCRO         | LARGO ROSANNA BENZI, 10 GENOVA (GE)<br>Italy                 |
| 1421 | COMITATO ETICO INDIPENDENTE                                                     | AZIENDA OSPEDALIEROUNIVERSITARI                                                      | Via Albertoni Pietro, 15 - Padiglione                        |

|      |                                                                                                                                 |                                                                                                                        |                                                            |
|------|---------------------------------------------------------------------------------------------------------------------------------|------------------------------------------------------------------------------------------------------------------------|------------------------------------------------------------|
|      |                                                                                                                                 | A<br>POLICLINICO S.ORSOLA -<br>MALPIGHI DI BOLOGNA                                                                     | 3 BOLOGNA (BO)<br>Italy                                    |
| 1422 | COMITATO ETICO<br>DELLE<br>PROVINCE DI TREVISO<br>E<br>BELLUNO                                                                  | AZIENDA ULSS 9 TREVISO                                                                                                 | VIA SANT'AMBROGIO DI<br>FIERA,<br>37 TREVISO (TV)<br>Italy |
| 1423 | COMITATO ETICO PER<br>LE<br>SPERIMENTAZIONI<br>CLINICHE DELLA<br>PROVINCIA DI<br>VENEZIA E<br>IRCCS SAN CAMILLO                 | ULSS 12<br>VENEZIANA                                                                                                   | VIA DON FEDERICO<br>TOSATTO,<br>147 VENEZIA (VE)<br>Italy  |
| 1424 | COMITATO ETICO<br>AREA<br>DI PAVIA -<br>FONDAZIONE<br>IRCCS POLICLINICO<br>SAN MATTEO DI PAVIA                                  | COMITATO ETICO AREA DI<br>PAVIA - FONDAZIONE IRCCS<br>POLICLINICO<br>SAN MATTEO DI PAVIA                               | VIALE GOLGI 19 PAVIA<br>(PV)<br>Italy                      |
| 1425 | COMITATO ETICO<br>DELL'AZIENDA<br>OSPEDALIERA<br>UNIVERSITARIA<br>MAGGIORE DELLA<br>CARITA' DI NOVARA                           | COMITATO ETICO<br>DELL'AZIENDA OSPEDALIERA<br>UNIVERSITARIA<br>MAGGIORE DELLA CARITA' DI<br>NOVARA                     | Corso Mazzini 18 NOVARA<br>(NO)<br>Italy                   |
| 1426 | COMITATO ETICO<br>DELL'OSPEDALE<br>ONCOLOGICO<br>REGIONALE DI<br>RIONERO<br>IN VULTURE (PZ)                                     | COMITATO ETICO<br>DELL'OSPEDALE<br>ONCOLOGICO<br>REGIONALE DI RIONERO IN<br>VULTURE (PZ)                               | VIA PADRE PIO, 1<br>RIONERO IN<br>VULTURE (PZ)<br>Italy    |
| 1427 | COMITATO ETICO<br>DELLA<br>AUSL LE DI LECCE                                                                                     | COMITATO ETICO DELLA<br>AUSL LE DI LECCE                                                                               | Via Miglietta 5 LECCE (LE)<br>Italy                        |
| 1428 | COMITATO di Bioetica<br>Palermo 1                                                                                               | c/o AZIENDA OSPEDALIERA<br>UNIVERSITARIA POLICLINICO<br>P. GIACCONE                                                    | VIA DEL VESPRO, 127<br>PALERMO<br>(PA)<br>Italy            |
| 1429 | COMITATO ETICO PER<br>LE<br>ATTIVITA' BIOMEDICHE<br>CARLO ROMANO<br>DELL'UNIVERSITA'<br>DEGLI<br>STUDI FEDERICO II DI<br>NAPOLI | COMITATO ETICO PER LE<br>ATTIVITA' BIOMEDICHE<br>CARLO ROMANO<br>DELL'UNIVERSITA' DEGLI<br>STUDI FEDERICO II DI NAPOLI | VIA SERGIO PANSINI, 5<br>NAPOLI<br>(NA)<br>Italy           |
| 1430 | COMITATO ETICO ASL<br>NA/1 DI NAPOLI                                                                                            | COMITATO ETICO ASL NA/1 DI<br>NAPOLI                                                                                   | STRADA COMUNALE DEL<br>PRINCIPE, 13 NAPOLI (NA)<br>Italy   |
| 1431 | COMITATO ETICO<br>UNICO<br>DELLA PROVINCIA DI<br>FERRARA                                                                        | COMITATO ETICO UNICO<br>DELLA PROVINCIA DI<br>FERRARA                                                                  | VIA ALDO MORO, 8<br>FERRARA<br>(FE)<br>Italy               |

|      |                                                                          |                                                                                     |                                                                             |
|------|--------------------------------------------------------------------------|-------------------------------------------------------------------------------------|-----------------------------------------------------------------------------|
| 1432 | COMITATO ETICO PER LE PROVINCE DI CHIETI E PESCARA                       | COMITATO ETICO PER LE PROVINCE DI CHIETI E PESCARA                                  | VIA DEI VESTINI, 31<br>CHIETI<br>SCALO (CH)<br>Italy                        |
| 1433 | COMITATO ETICO DELL'UNIVERSITA' CATTOLICA DEL S. CUORE                   | POLICLINICO GEMELLI, ROMA - LAZIO                                                   | LARGO GEMELLI 8 ROMA (RM)<br>Italy                                          |
| 1434 | COMITATO ETICO LAZIO 2                                                   | ASL ROMA C                                                                          | VIA PRIMO CARNERA, 1<br>ROMA (RM)<br>Italy                                  |
| 1435 | COMITATO ETICO PER LE SPERIMENTAZIONI CLINICHE DELLA PROVINCIA DI PADOVA | AOU PADOVA                                                                          | VIA NICOLO' GIUSTINIANI, 2<br>PADOVA (PD)<br>Italy                          |
| 1436 | COMITATO ETICO DELLE AZIENDE SANITARIE DELL'UMBRIA                       | SEGRETERIA SCIENTIFICO-AMMINISTRATIVA DEL CEAS UMBRIA                               | Via della Rivoluzione, 16 -<br>ELLERA DI CORCIANO<br>CORCIANO (PG)<br>Italy |
| 1437 | COMITATO DI ETICA DELLA ASL DI SALERNO                                   | COMITATO DI ETICA DELLA ASL DI SALERNO                                              | VIA FEDERICO RICCO 50<br>NOCERA INFERIORE (SA)<br>Italy                     |
| 1438 | COMITATO ETICO DELLA PROVINCIA DI BERGAMO                                | COMITATO ETICO DELLA PROVINCIA DI BERGAMO                                           | PIAZZA OMS, 1 BERGAMO (BG)<br>Italy                                         |
| 1439 | COMITATO ETICO INDIPENDENTE                                              | AZIENDA OSPEDALIERA UNIVERSITARIA S. LUIGI GONZAGA DI ORBASSANO                     | Via Regione Gonzole, 10<br>ORBASSANO (TO)<br>Italy                          |
| 1440 | COMITATO ETICO DELL'IRCCS ISTITUTO TUMORI GIOVANNI PAOLO II DI BARI      | SEZIONE PRESSO LA FONDAZIONE CASA SOLLIEVO DELLA SOFFERENZA DI SAN GIOVANNI ROTONDO | VIALE CAPPUCCINI SAN GIOVANNI ROTONDO (FG)<br>italy                         |
| 1441 | COMITATO ETICO AZIENDA OSPEDALIERA UNIVERSITARIA DI CAGLIARI             | COMITATO ETICO AZIENDA OSPEDALIERA UNIVERSITARIA DI CAGLIARI                        | VIA OSPEDALE, 54<br>CAGLIARI (CA)<br>Italy                                  |
| 1442 | COMITATO ETICO AZIENDA OSPEDALIERA UNIVERSITARIA DI CAGLIARI             | COMITATO ETICO AZIENDA OSPEDALIERA UNIVERSITARIA DI CAGLIARI                        | VIA OSPEDALE, 54<br>CAGLIARI (CA)<br>Italy                                  |
| 1443 | COMITATO ETICO INTERAZIENDALE                                            | AO SS. ANTONIO E BIAGIO E CESARE ARRIGO DI ALESSANDRIA                              | Via Venezia 16<br>ALESSANDRIA (AL)<br>Italy                                 |
| 1445 | COMITATO ETICO PER LA SPERIMENTAZIONE CLINICA DELLA                      | ULSS 6 VICENZA                                                                      | VIALE F. RODOLFI, 37<br>VICENZA (VI)<br>Italy                               |

|      |                                                                                                                 |                                                                                                                 |                                                |
|------|-----------------------------------------------------------------------------------------------------------------|-----------------------------------------------------------------------------------------------------------------|------------------------------------------------|
|      | PROVINCIA DI VICENZA                                                                                            |                                                                                                                 |                                                |
| 1446 | COMITATO ETICO PALERMO 2                                                                                        | AZIENDA OSPEDALIERA OSPEDALI RIUNITI VILLA SOFIA - CERVELLO                                                     | VIA TRABUCCO, 180 PALERMO (PA) Italy           |
| 1447 | COMITATO ETICO LAZIO 2                                                                                          | ASL ROMA C                                                                                                      | VIA PRIMO CARNERA, 1 ROMA (RM) Italy           |
| 1448 | COMITATO ETICO IRST IRCCS AVR                                                                                   | COMITATO ETICO IRST IRCCS AVR                                                                                   | Via Piero Maroncelli, 40 MELDOLA (FC) Italy    |
| 1449 | COMITATO ETICO DELLA FONDAZIONE IRCCS ISTITUTO NAZIONALE DEI TUMORI DI MILANO                                   | COMITATO ETICO DELLA FONDAZIONE IRCCS ISTITUTO NAZIONALE DEI TUMORI DI MILANO                                   | VIA GIACOMO VENEZIAN, 1 MILANO (MI) Italy      |
| 1450 | COMITATO ETICO DELL'AZIENDA OSPEDALIERO-UNIVERSITARIA OSPEDALI RIUNITI UMBERTO I -GM LANCISI-G. SALES DI ANCONA | COMITATO ETICO DELL'AZIENDA OSPEDALIERO-UNIVERSITARIA OSPEDALI RIUNITI UMBERTO I -GM LANCISI-G. SALES DI ANCONA | Via Conca, Torrette ANCONA (AN) Italy          |
| 1451 | COMITATO ETICO DELL'AZIENDA OSPEDALIERA OSPEDALI RIUNITI MARCHE NORD                                            | COMITATO ETICO DELL'AZIENDA OSPEDALIERA OSPEDALI RIUNITI MARCHE NORD                                            | Piazzale Cinelli, 4 PESARO (PU) Italy          |
| 1452 | COMITATO ETICO DELL'IRCCS ISTITUTO PER LO STUDIO E LA CURA DEI TUMORI                                           | FONDAZIONE GIOVANNI PASCALE DI NAPOLI                                                                           | Via Semmola Mariano NAPOLI (NA) Italy          |
| 1453 | COMITATO ETICO DELL'AZIENDA OSPEDALIERA DI RILIEVO NAZIONALE E DI ALTA SPECIALIZZAZIONE GARIBALDI DI CATANIA    | COMITATO ETICO DELL'AZIENDA OSPEDALIERA DI RILIEVO NAZIONALE E DI ALTA SPECIALIZZAZIONE GARIBALDI DI CATANIA    | PIAZZA SANTA MARIA GESU', 5 CATANIA (CT) Italy |
| 1454 | COMITATO PER LA SPERIMENTAZIONE CLINICA DEI MEDICINALI AREA VASTA NORD OVEST                                    | AZIENDA OSPEDALIERO UNIVERSITARIA PISANA DI PISA                                                                | VIA ROMA, 67 PISA (PI) Italy                   |
| 1455 | COMITATO ETICO MILANO AREA B                                                                                    | c/o FONDAZIONE IRCCS CA' GRANDA OSPEDALE MAGGIORE                                                               | VIA FRANCESCO SFORZA, 28                       |

|      |                                                                                                                                 |                                                                                    |                                                                       |
|------|---------------------------------------------------------------------------------------------------------------------------------|------------------------------------------------------------------------------------|-----------------------------------------------------------------------|
|      |                                                                                                                                 | POLICLINICO - PALAZZO<br>UFFICI - 2° piano - c.a.<br>dr.ssa Patti                  | MILANO (MI)<br>Italy                                                  |
| 1456 | COMITATO ETICO<br>DELLA<br>PROVINCIA DI<br>BRESCIA                                                                              | COMITATO ETICO DELLA<br>PROVINCIA DI BRESCIA                                       | PIAZZALE SPEDALI CIVILI,<br>1<br>BRESCIA (BS)<br>Italy                |
| 1457 | COMITATO ETICO<br>DELLA<br>PROVINCIA DI MONZA<br>BRIANZA                                                                        | COMITATO ETICO DELLA<br>PROVINCIA DI MONZA<br>BRIANZA                              | VIA PERGOLES 33<br>MONZA (MB)<br>Italy                                |
| 1458 | COMITATO ETICO<br>DELL'AZIENDA<br>OSPEDALIERA 'S.<br>GIUSEPPE MOSCATI'<br>DI AVELLINO                                           | COMITATO ETICO<br>DELL'AZIENDA OSPEDALIERA<br>'S. GIUSEPPE MOSCATI'<br>DI AVELLINO | CONTRADA AMORETTA-<br>CITTA'<br>OSPEDALIERA AVELLINO<br>(AV)<br>Italy |
| 1460 | COMITATO ETICO<br>INTERAZIENDALE A.O.<br>CITTA' DELLA SALUTE<br>E<br>DELLA SCIENZA DI<br>TORINO - AO<br>MAURIZIANO DI<br>TORINO | ASL TO1                                                                            | CORSO BRAMANTE, 88/90<br>TORINO (TO)<br>Italy                         |
| 1461 | COMITATO ETICO<br>LAZIO 1                                                                                                       | AZIENDA OSPEDALIERA SAN<br>CAMILLO<br>- C. FORLANINI DI ROMA                       | CIRCONVALLAZIONE<br>GIANICOLENSE, 87 ROMA<br>(RM)<br>Italy            |
| 1462 | COMITATO ETICO<br>DELL'AZIENDA<br>OSPEDALIERA<br>PUGLIESE<br>- CIACCIO DI<br>CATANZARO                                          | COMITATO ETICO<br>DELL'AZIENDA OSPEDALIERA<br>PUGLIESE - CIACCIO DI<br>CATANZARO   | VIA VINICIO CORTESE, 25<br>CATANZARO (CZ)<br>Italy                    |
| 1600 | Niezalezna Komisja<br>Bioetyczna ds. Badan<br>Naukowych                                                                         | Gdanski Uniwersytet Medyczny                                                       | Gdansk Pomorskie 80-211<br>Poland                                     |
| 1602 | Komisja Bioetyczna                                                                                                              | Opolska Izba Lekarska                                                              | Opole Opolskie 45-054<br>Poland                                       |
| 1603 | Komisja Bioetyczna                                                                                                              | Slaski Uniwersytet Medyczny                                                        | Katowice Slaskie 40-055<br>Poland                                     |
| 1604 | Komisja Bioetyczna                                                                                                              | Uniwersytet Mikolaja Kopernika<br>w Toruniu                                        | Bydgoszcz Kujawsko-<br>Pomorskie 85-<br>094<br>Poland                 |
| 1605 | Komisja Bioetyczna                                                                                                              | Uniwersytet Jagiellonski                                                           | Krakow Malopolskie 31-531<br>Poland                                   |
| 1606 | Komisja Bioetyczna                                                                                                              | Instytut Hematologii i<br>Transfuzjologii                                          | Warszawa Mazowieckie 02-<br>776<br>Poland                             |
| 1700 | Conselho de<br>Administração                                                                                                    | CHTMAD - Hospital Vila Real                                                        | Vila Real 5000-508<br>Portugal                                        |
| 1701 | Conselho de<br>Administração                                                                                                    | CENTRO HOSPITALAR DO<br>PORTO, EPE - HSA                                           | Porto 4099-001<br>Portugal                                            |

|      |                                                                               |                                                     |                                       |
|------|-------------------------------------------------------------------------------|-----------------------------------------------------|---------------------------------------|
| 1702 | Conselho de Administração                                                     | Centro Hospitalar Lisboa Norte, E.P.E.              | Lisboa 1649-035 Portugal              |
| 1703 | Conselho de Administração                                                     | Centro Hospitalar do Algarve, E.P.E.                | Faro 8000-386 Portugal                |
| 1704 | Conselho de Administração                                                     | Centro Hospitalar e Universitario de Coimbra, E.P.E | Coimbra 3000-075 Portugal             |
| 1801 | Eticka komisia Univerzitna nemocnica Bratislava Nemocnica sv. Cyrila a Metoda | NA                                                  | Bratislava Slovakia SK-85107 Slovakia |
| 1900 | Comite Etico de Investigacion Hospital Regional Universitario de Malaga       | Unidad Garantia de Calidad                          | Malaga Malaga Spain                   |
| 1901 | Comite Etico de Investigacion Clinica, Complejo Hospitalario de Jaen          | NA                                                  | Jaen Jaen Spain                       |
| 1902 | COMITE ETICO DE INVESTIGACION Hospital Universitario Virgen Macarena          | Unidad de Investigacion                             | Sevilla Sevilla Spain                 |
| 1903 | Comite de Etica de Investigacion del Hospital Universitario Virgen del Rocio  | Ensayos Clinicos                                    | Sevilla Sevilla Spain                 |
| 1904 | Comite de Etica de Investigacion del Hospital Universitario Puerta del Mar    | Docencia MIR                                        | Cadiz Cadiz Spain                     |
| 1906 | Comite Etico de Investigacion Clinica de Aragon (CEICA)                       | Instituto Aragonés de Ciencias de la Salud          | Zaragoza Zaragoza Spain               |
| 1907 | Comite Etico de Investigacion Clinica de Aragon (CEICA)                       | Instituto Aragonés de Ciencias de la Salud          | Zaragoza Zaragoza Spain               |
| 1908 | Comite de Etica de la Investigacion del Principado de Asturias                | NA                                                  | Oviedo Asturias Spain                 |
| 1909 | CEIC del Hospital General Universitario de Alicante                           | NA                                                  | Alicante Alicante 03010 Spain         |
| 1910 | CEIC del Hospital Clinico Universitario de Valencia                           | Secretaria                                          | Valencia Valencia Spain               |
| 1911 | CEIC del Hospital Universitario La Fe                                         | Secretaria del CEIC                                 | Valencia Valencia Spain               |
| 1912 | CEIC de Cantabria                                                             | Secretaria Tecnica                                  | Santander Cantabria Spain             |
| 1913 | Comite Etico de Investigacion Clinica del                                     | NA                                                  | Barcelona Barcelona 08036 Spain       |

|      |                                                                                                        |                                                                         |                                               |
|------|--------------------------------------------------------------------------------------------------------|-------------------------------------------------------------------------|-----------------------------------------------|
|      | Hospital Clinic de Barcelona                                                                           |                                                                         |                                               |
| 1914 | Comite Etico de Investigacion Clinica del Parc de Salut Mar                                            | NA                                                                      | Barcelona Barcelona 08003 Spain               |
| 1915 | Comite Etico de Investigacion Clinica del Hospital Universitari Germans Trias i Pujol                  | Secretaria Tecnica                                                      | Badalona Barcelona 08916 Spain                |
| 1916 | Comite de Etica de Investigacion Clinica Hospital Universitari de Bellvitge                            | Secretaria Administrativa                                               | Hospitalet de Llobregat Barcelona 08907 Spain |
| 1917 | CEIC Hospital Universitari Vall d'Hebron                                                               | Unidad de Soporte al CEIC                                               | Barcelona Barcelona 08035 Spain               |
| 1918 | Comite Etico de Investigacion Clinica Hospital Universitari de Tarragona Joan XXIII                    | Secretaria Tecnica-Admisnitrativa del CEIC                              | Tarragona Tarragona Spain                     |
| 1919 | Comite d'Etica d'investigacio Clinica (CEIC) de l'Hospital Universitari Doctor Josep Trueta, de Girona | NA                                                                      | Girona Girona Spain                           |
| 1921 | CEIC Complejo Hospitalario de Toledo                                                                   | Antigua Escuela de Enfermeras                                           | Toledo Toledo Spain                           |
| 1923 | Comite Autonómico de Etica de la Investigacion de Galicia - SERGAS                                     | Subdireccion de Farmacia y Productos Sanitarios Conselleria de Sanidade | Santiago de Compostela La Coruña Spain        |
| 1925 | COMITE ETICO DE INVESTIGACION CLINICA HOSPITAL UNIVERSITARIO DE SALAMANCA                              | NA                                                                      | Salamanca Salamanca Spain                     |
| 1926 | CEIC Complejo Asistencial de Burgos                                                                    | Unidad de Investigacion                                                 | Burgos Burgos 09006 Spain                     |
| 1928 | Comite de Etica de la Investigacion de las Illes Balears (CEI-IB)                                      | Direccion General de Salud Publica y Consumo                            | Palma de Mallorca Islas Baleares 07010 Spain  |
| 1929 | Comite Etico de Investigacion Clinica HOSPITAL DE GRAN CANARIA DOCTOR NEGRIN                           | Secretaria CEIC                                                         | Las Palmas de Gran Canaria Las Palmas Spain   |
| 1931 | Comite Etico de Investigacion Clinica HOSPITAL UNIVERSITARIO LA PRINCESA                               | NA                                                                      | Madrid Madrid Spain                           |

|      |                                                                                              |                                                   |                                 |
|------|----------------------------------------------------------------------------------------------|---------------------------------------------------|---------------------------------|
| 1933 | Instituto de Investigacion Hospital 12 de Octubre                                            | Unidad de Gestion Economica- Facturacion/Ingresos | Madrid Madrid Spain             |
| 1934 | CEIC Hospital Univ. Puerta de Hierro de Majadahonda                                          | Secretaria Tecnica del CEIC                       | Majadahonda Madrid Spain        |
| 1935 | CEIC Aea 3 Direccion Medica HOSPITAL UNIVERSITARIO PRINCIPE DE ASTURIAS DE ALCALA DE HENARES | Direccion Medica                                  | Alcala de Henares Madrid Spain  |
| 1936 | Comite Etico de Investigacion Clinica HOSPITAL UNIVERSITARIO LA PAZ                          | NA                                                | Madrid Madrid Spain             |
| 1937 | CEIC Area 7 - Hospital Clinico San Carlos de Madrid                                          | Servicio de Farmacologia Clinica                  | Madrid Madrid Spain             |
| 1938 | CEIC Hospital Univ. Puerta de Hierro de Majadahonda                                          | Secretaria Tecnica del CEIC                       | Majadahonda Madrid Spain        |
| 1939 | CEIC DEL HOSPITAL VIRGEN DE LA ARRIXACA                                                      | NA                                                | El Palmar Murcia Spain          |
| 1940 | Comite Etico de Investigacion Clinica de Navarra                                             | Secretaria Tecnica del CEIC                       | Pamplona Navarra Spain          |
| 1941 | Comite Etico de Investigacion Clinica de Euskadi (CEIC-E)                                    | Secretaria del CEIC                               | Vitoria Alava 01010 Spain       |
| 1942 | Comite Etico de Investigacion Clinica de Euskadi (CEIC-E)                                    | Secretaria del CEIC                               | Vitoria Alava 01010 Spain       |
| 1943 | Comite Etico de Investigacion Clinica HOSPITAL UNIVERSITARIO LA PAZ                          | NA                                                | Madrid Madrid Spain             |
| 1944 | Comite Etico de Investigacion Clinica HOSPITAL UNIVERSITARIO LA PAZ                          | NA                                                | Madrid Madrid Spain             |
| 1946 | Comite Etico de Investigacion Clinica HOSPITAL RAMON Y CAJAL                                 | NA                                                | Madrid Madrid Spain             |
| 1947 | COMITE ETICO DE INVESTIGACION CLINICA HOSPITAL DE LA                                         | NA                                                | Barcelona Barcelona 08025 Spain |



|      |                                                                                           |                                                                               |                                              |
|------|-------------------------------------------------------------------------------------------|-------------------------------------------------------------------------------|----------------------------------------------|
|      | SANTA<br>CREU I SANT PAU                                                                  |                                                                               |                                              |
| 1948 | COMITE ETICO DE<br>INVESTIGACION<br>CLINICA<br>HOSPITAL DE LA<br>SANTA<br>CREU I SANT PAU | NA                                                                            | Barcelona Barcelona 08025<br>Spain           |
| 1949 | COMITE ETICO DE<br>INVESTIGACION<br>CLINICA<br>HOSPITAL DE LA<br>SANTA<br>CREU I SANT PAU | NA                                                                            | Barcelona Barcelona 08025<br>Spain           |
| 1950 | Comite Etico de<br>Investigacion Clinica de<br>la Rioja                                   | Consejeria de Salud                                                           | Logroño Logroño<br>Spain                     |
| 1951 | CEIC Corporacio<br>Sanitaria Parc Taulet                                                  | NA                                                                            | Sabadell Barcelona 08208<br>Spain            |
| 1952 | CEIC del Hospital<br>Universitario de Canarias                                            | NA                                                                            | La Laguna Tenerife<br>Spain                  |
| 1953 | Comite Autonómico de<br>Etica de la Investigacion<br>de Galicia - SERGAS                  | Subdireccion de Farmacia y<br>Productos Sanitarios<br>Conselleria de Sanidade | Santiago de Compostela La<br>Coruña<br>Spain |
| 1954 | Comite Etico de<br>Investigacion Clinica de<br>Aragon (CEICA)                             | Instituto Aragonés de Ciencias<br>de la Salud                                 | Zaragoza Zaragoza<br>Spain                   |
| 1955 | Comite Etico de<br>Investigacion<br>Hospital Regional<br>Universitario de Malaga          | Secretaria del CEIC                                                           | Malaga Malaga<br>Spain                       |
| 2102 | GENERAL HOSPITAL<br>OF ATHENS<br>"EVAGELISMOS"                                            | HEMATOLOGY CLINIC                                                             | ATHENS IPSILANTOU 45-<br>47<br>GREECE        |
| 2104 | GENERAL HOSPITAL<br>OF ATHENS "LAIKO"                                                     | 1ST PROP.INT.MEDICINE<br>CLINIC                                               | ATHENS AGIOU THOMA<br>17<br>GREECE           |
| 2107 | GENERAL HOSPITAL<br>OF ATHENS<br>"GENIMATAS"                                              | HEMATOLOGY DPT                                                                | ATHENS MESOGEION AV.<br>154<br>GREECE        |
| 2108 | UNIVERSITY GENERAL<br>HOSPITAL OF PATRAS                                                  | HEMATOLOGY DPT                                                                | PATRA RIO PATRAS<br>GREECE                   |
| 3100 | Institutional Review<br>board, King Abdullah<br>International<br>Medical Research Center  | Research Center                                                               | Riyadh<br>Saudi Arabia                       |
| 3101 | Institutional Review<br>board, King Abdullah<br>International<br>Medical Research Center  | Research Center                                                               | Riyadh<br>Saudi Arabia                       |
| 3160 | Comite d'Ethique pour la<br>Recherche Biomedicale                                         | Departement de pharmacologie                                                  | Casablanca Casablanca<br>Morocco             |
| 3530 | Ethics and Medical and<br>Research Department,                                            | St Vincent's Healthcare Group<br>Ltd                                          | Dublin D4<br>Ireland                         |

|      |                                                                                               |             |                                                 |
|------|-----------------------------------------------------------------------------------------------|-------------|-------------------------------------------------|
|      | Education & Research Centre,                                                                  |             |                                                 |
| 4000 | Comite Independiente de Etica para Ensayos en Farmacologia Clinica                            | NA          | CABA CABA C1027AAP Argentina                    |
| 4001 | Comite Independiente de Etica para Ensayos en Farmacologia Clinica                            | NA          | CABA CABA C1027AAP Argentina                    |
| 4002 | Comite Independiente de Etica para Ensayos en Farmacologia Clinica                            | NA          | CABA CABA C1027AAP Argentina                    |
| 4003 | Comite de Etica en Investigacion                                                              | NA          | Buenos Aires Buenos Aires 609 (1221). Argentina |
| 4004 | Comite de Revision Interna. Hospital Privado                                                  | NA          | Cordoba Cordoba X5016KEH Argentina              |
| 4006 | Comite de Etica en Investigacion Hospital Español Sociedad de Beneficiencia.                  | NA          | CABA CABA 1209 Argentina                        |
| 5000 | Associação de Combate ao Cancer                                                               | EC          | Goiania GO 74605-070 Brazil                     |
| 5001 | Casa de Saude Santa Marcelina                                                                 | EC          | Sao Paulo SP 06270-070 Brazil                   |
| 5002 | Hospital de Clinica da UFPR                                                                   | EC          | Curitiba PR 80060-900 Brazil                    |
| 5003 | Universidade Federal de Minas Gerais                                                          | EC          | Belo Horizonte MG 31270-901 Brazil              |
| 5004 | Hospital das Clinicas da Faculdade de Medicina de Ribeirao Preto da Universidade de Sao Paulo | EC          | Ribeirao Preto SP 14048-900 Brazil              |
| 5005 | Faculdade de Ciencias Medicas da UNICAMP                                                      | EC          | Campinas SP 13083-970 Brazil                    |
| 5006 | Irmandade Santa Casa de Sao Paulo                                                             | EC          | Sao Paulo SP 01221-010 Brazil                   |
| 5007 | Hospital de Clinicas de Porto Alegre - HCPA/UFRGS                                             | EC          | Porto Alegre RS 90035-903 Brazil                |
| 5008 | Hospital Israelita Albert Einstein                                                            | EC          | Sao Paulo SP 05652-000 Brazil                   |
| 5009 | Hemorio - RJ                                                                                  | EC          | Rio de Janeiro RJ 20211-090 Brazil              |
| 6010 | CREIMED Comite de Estudios Medicos SAS                                                        | Antioquia   | Medellin Antioquia Colombia                     |
| 6011 | Comite de Etica en Investigacion con Seres Humanos                                            | Bogota D.C. | Bogota D.C. Bogota D.C. Colombia                |
| 7011 | Comite de Etica en Investigacion del Instituto                                                | NA          | Ciudad de Mexico Ciudad de                      |

|      |                                                                                                                                                                        |                                       |                                             |
|------|------------------------------------------------------------------------------------------------------------------------------------------------------------------------|---------------------------------------|---------------------------------------------|
|      | Mexicano del Seguro Social, Coordinacion de Investigacion en Salud                                                                                                     |                                       | Mexico<br>Mexico                            |
| 7012 | Comite de Etica en Investigacion del Hospital General de Mexico Dr. Eduardo Liceaga                                                                                    | NA                                    | Ciudad de Mexico Ciudad de Mexico<br>Mexico |
| 7013 | Comite de Etica en Investigacion del Hospital Dr. Jose Eleuterio Gonzalez de la Facultad de Medicina y Hospital Universitario de la Universidad Autonoma de Nuevo Leon | NA                                    | Monterrey Nuevo Leon<br>Mexico              |
| 7014 | Comite de Etica en Investigacion del Hospital General del Estado de Sonora Dr. Ernesto Ramos Boursa                                                                    | NA                                    | Hermosillo Sonora<br>Mexico                 |
| 7015 | Comite de Etica en Investigacon del Hospital Civil de Guadalajara Fray Antonio Alcalde                                                                                 | NA                                    | Guadalajara Jalisco<br>Mexico               |
| 9010 | Commissie Medische Ethiek                                                                                                                                              | Commissie Medische Ethiek             | Leuven Vlaams Brabant<br>Belgium            |
| 9011 | Ethisch Comite UZA                                                                                                                                                     | Ethisch Comite UZA                    | Edegem Antwerpen<br>Belgium                 |
| 9013 | Commissie voor Medische Ethiek ZNA                                                                                                                                     | Commissie voor medische ethiek ZNA    | Antwerpen Antwerpen<br>Belgium              |
| 9014 | Commissie Medische Ethiek                                                                                                                                              | Commissie Medische Ethiek             | Roeselare West Vlaanderen<br>Belgium        |
| 9015 | Commissie Medische Ethiek                                                                                                                                              | Commissie Medische Ethiek             | Bruxelles Bruxelles<br>Belgium              |
| 9016 | Commissie Medische Ethiek                                                                                                                                              | Commissie Medische Ethiek             | Bruxelles Bruxelles<br>Belgium              |
| 9017 | Comite d'Ethique hospitalo-facultaire                                                                                                                                  | Comite d'Ethique hospitalo-facultaire | Luik Luik<br>Belgium                        |
| 9020 | Ethisch Comite Sint Jan                                                                                                                                                | Ethisch Comite                        | Brugge West Vlaanderen<br>Belgium           |
| 9021 | Ethisch Commissie GZA                                                                                                                                                  | Ethisch Commissie GZA                 | Wilrijk Antwerpen<br>Belgium                |
| 9022 | Comite d'Ethique                                                                                                                                                       | Comite d'Ethique                      | Charleroi<br>Belgium                        |
| 9023 | Comite d'Ethique                                                                                                                                                       | Comite d'Ethique                      | Bruxelles<br>Belgium                        |
| 9024 | Comite d'Ethique                                                                                                                                                       | Comite d'Ethique                      | Yvoir<br>Belgium                            |
| 9025 | Ethisch comite UZ Gent                                                                                                                                                 | Ethisch comite UZ Gent                | Gent<br>Belgium                             |

|      |                                      |                                   |                          |
|------|--------------------------------------|-----------------------------------|--------------------------|
| 9026 | Commissie voor<br>Medische<br>Ethiek | Commissie voor medische<br>ethiek | Kortrijk<br>Belgium      |
| 9027 | CRP sante                            | Comite d'Ethique                  | Luxembourg<br>Luxembourg |
